# Supplementary material for: User Engagement Associated with Web-Intervention Features to Attain Clinically Meaningful Weight Loss and Weight Maintenance in Rural Women
Source: Hindawi journal article supplement (doi:10.1155/2019/7932750), 2019-03-03
Supplement: f1 [file 7932750.f1.pdf]

**Journal of Obesity**  
**Manuscript 7932750**

Supplemental Materials: Materials include web-based messaging content delivered during two phases of the intervention.

Supplementary Table 1: Website Theory-Based Message Intervention Content for Phase 1 (baseline to 6 months).

Supplementary Table 2: Website "Hot Topic" Message Intervention Content for Phase 2 (6 months to 18 months).



**Table 1. Website Theory-Based Message Intervention Content-Phase 1 (baseline to 6 months)  
Women Weigh-In for Wellness Study (WWW Study)**

| 9    | Sleep & Weight Connection                         | X    |    |     |                   |     |               |     |   |            |     |              |       |   |  |
|------|---------------------------------------------------|------|----|-----|-------------------|-----|---------------|-----|---|------------|-----|--------------|-------|---|--|
|      | Avoid Food Habits that Interfere with Your Sleep  |      |    | X   |                   | X   |               | X   |   |            | X   |              |       |   |  |
| Week | Content                                           | Info |    |     | Benefits Barriers |     | Self Efficacy |     |   | IP Support |     | Self Monitor | Goals |   |  |
|      |                                                   | G    | PA | Eat | PA                | Eat | PA            | Eat | O | PA         | Eat |              |       |   |  |
| 10   | Regular Exercise Helps you Sleep Better           |      | X  |     | X                 |     |               |     |   |            |     |              |       |   |  |
| 11   | Stress Can Interfere with your Weight Loss        | X    |    |     | X                 | X   |               |     |   |            |     |              |       |   |  |
|      | Barriers of Stress                                |      |    |     | X                 | X   |               |     |   | X          | X   |              |       |   |  |
|      | Success Story: Mary Kay's A-Ha Moment             |      |    |     |                   |     |               |     |   | X          | X   |              |       |   |  |
|      | Need a Healthy Snack?                             |      |    | X   |                   |     |               |     |   |            |     |              |       |   |  |
| 12   | Look at Your New Normal Lifestyle                 | X    |    |     |                   |     |               | X   | X | X          |     |              |       |   |  |
|      | Finding it difficult to meet your activity goals? |      |    |     | X                 |     |               |     |   |            |     |              |       |   |  |
|      | Limit Screen Time to Lose Weight                  |      |    |     | X                 |     |               |     |   |            |     |              |       |   |  |
|      | I Love Vegetables Recipe                          |      |    | X   |                   |     |               |     |   |            |     |              |       |   |  |
| 13   | Your New Lifestyle and 6S Behaviors               | X    |    |     |                   |     |               | X   | X | X          |     |              | X     | X |  |
|      | Use the 6S Plan to Enjoy Social Gatherings        |      |    |     |                   |     |               |     |   |            |     | X            |       |   |  |
|      | Sensible Tips to Eating Out                       |      |    |     |                   |     |               |     |   |            |     | X            |       |   |  |
|      | Smarter Eating Tips by Type of Restaurant         |      |    | X   |                   | X   |               | X   |   |            |     |              | X     |   |  |
| 14   | Clean out your closet for success                 | X    |    |     |                   |     |               |     |   | X          |     |              | X     |   |  |
|      | Forget Fatigue - Find Energy                      |      | X  |     | X                 |     |               | X   |   |            | X   |              |       |   |  |
|      | Breakfast Fruit Cup Recipe                        |      |    | X   |                   |     |               |     |   |            |     |              |       |   |  |
| 15   | Transformation of Mind and Body                   | X    |    |     |                   |     |               |     |   | X          |     |              |       | X |  |
|      | Plan Your Personal Success Story                  | X    |    |     |                   |     |               |     |   |            |     |              |       | X |  |
|      | Fine Tune Your Efforts to be More Active for life |      | X  |     | X                 |     |               | X   |   |            | X   |              | X     |   |  |
|      | Success Story: Betty's Successful Activity Habit  |      |    |     |                   |     |               | X   | X |            |     |              |       |   |  |
| 16   | Get Re-Motivated & Energized                      | X    |    |     |                   |     |               |     |   |            |     |              |       |   |  |
|      | 5 Ways to Beat Boredom with Physical Activity     |      | X  |     | X                 |     |               |     |   |            |     |              |       |   |  |
|      | Be Grateful that you can do physical activity     |      |    |     |                   |     |               | X   |   |            |     |              |       |   |  |
|      | Updated Nutrition Guide with Suggested Servings   |      |    | X   |                   |     |               |     | X |            |     |              | X     |   |  |
|      | MyPlate Guide for a Balanced Diet                 |      |    | X   |                   |     |               |     |   |            |     |              |       |   |  |
| 17   | Do you LOVE a bargain?                            | X    |    |     |                   |     |               |     |   | X          |     |              |       |   |  |
|      | Health Costs of Overweight                        | X    |    |     | X                 | X   |               |     |   |            |     |              |       |   |  |
|      | EAT BREAKFAST!                                    |      |    | X   |                   |     |               |     |   |            |     |              |       |   |  |
|      | Nutrition Corner as a Rainbow                     |      |    | X   |                   | X   |               |     |   |            |     |              |       |   |  |
| 18   | Super S! Challenging Situations                   |      |    |     | X                 | X   |               | X   | X | X          | X   | X            |       |   |  |
|      | No Couch Potato!                                  |      | X  |     | X                 |     |               | X   |   |            | X   |              |       |   |  |
|      | Nutrition Corner: Fabulous Fruits!                |      |    | X   |                   | X   |               |     |   |            |     |              |       |   |  |
|      | Busting Weight Loss Myths                         | X    |    |     |                   |     |               | X   | X | X          |     |              |       |   |  |

Legend: G - General                      O - Other  
PA - Physical Activity                  IP - Interpersonal
